# Supplementary material for: Rift thermal inheritance in the SW Alps (France): insights from RSCM thermometry and 1D thermal numerical modelling
Source: Copernicus journal article supplement (doi:10.5194/se-14-1-2023), 2023-01-04
Supplement: Supplementary file 1 [file Suppl_Table.pdf › Suppl_Table.pdf]

| Sample and spectrum | D band             |                 | G band             |                 | RSB parameter (cm-1) | R1 parameter |
|---------------------|--------------------|-----------------|--------------------|-----------------|----------------------|--------------|
|                     | Relative intensity | Position (cm-1) | Relative intensity | Position (cm-1) |                      |              |
| CSN 09 SP 02        | 14927.1232         | 1346.99776      | 32366.1859         | 1601.28114      | 254.28338            | 0.461195     |
| SLC07-448 sp05      | 3971.71133         | 1353.58917      | 6484.0841          | 1597.98071      | 244.39154            | 0.61253236   |
| LRG03-408 sp13      | 23836.7634         | 1346.59721      | 48623.0622         | 1600.94686      | 254.34965            | 0.49023575   |
| LAU07 sp03          | 33465.8204         | 1342.5764       | 41618.3378         | 1604.05725      | 261.48085            | 0.80411237   |
| LAU04-403 SP01      | 12279.2692         | 1337.2481       | 17570.7525         | 1604.0001       | 266.752              | 0.69884709   |
| DGN02-385 SPDC      | 10809.0693         | 1333.52837      | 23145.5092         | 1604.15185      | 270.62348            | 0.46700503   |
| DEV07 sp13          | 53280.1593         | 1341.46324      | 98595.9442         | 1603.95769      | 262.49445            | 0.54038896   |
| DEV02 sp12          | 18351.4733         | 1343.77494      | 35135.4273         | 1598.09638      | 254.32144            | 0.52230682   |
| CSN06 SP 15         | 37299.5177         | 1339.23442      | 84135.3668         | 1602.78251      | 263.54809            | 0.44332745   |
| CSN02-339 SP 01     | 99540.9748         | 1333.10401      | 1.76E+05           | 1604.1938       | 271.08979            | 0.56621715   |
