# Supplementary material for: Rift thermal inheritance in the SW Alps (France): insights from RSCM thermometry and 1D thermal numerical modelling
Source: Copernicus journal article supplement (doi:10.5194/se-14-1-2023), 2023-01-04
Supplement: Supplementary file [file se-14-1-2023-supplement-title-page.pdf › se-14-1-2023-supplement-title-page.pdf]

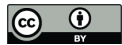

*Supplement of*

**Rift thermal inheritance in the SW Alps (France): insights from RSCM thermometry and 1D thermal numerical modelling**

**Naïm Célini et al.**

*Correspondence to:* Naïm Célini (celini.naim@gmail.com)

- se-14-1-2023-supplement-title-page.pdf
- Suppl\_File\_1\_Raman\_Data.jpg
- Suppl\_File\_2\_Revised.jpg
- Suppl\_File\_3\_Revised.jpg
- Suppl\_File\_4\_Revised.jpg
- Suppl\_Table.pdf

The copyright of individual parts of the supplement might differ from the article licence.
